# Supplementary material
Source: Springer Nature journal article supplement (https://www.springermedizin.de/resource/supplementary/12984_2008_151_MOESM1_ESM.pdf/9605410)

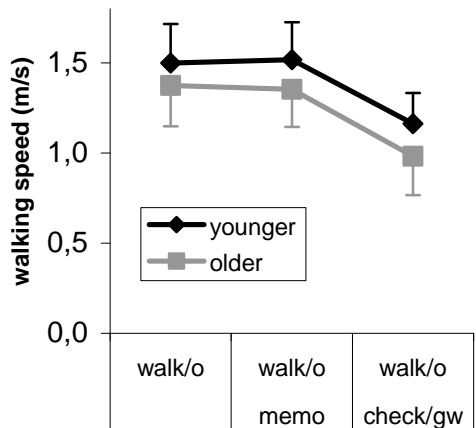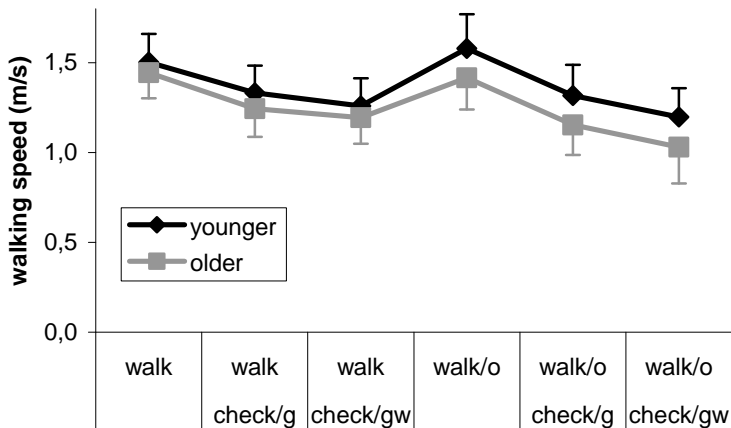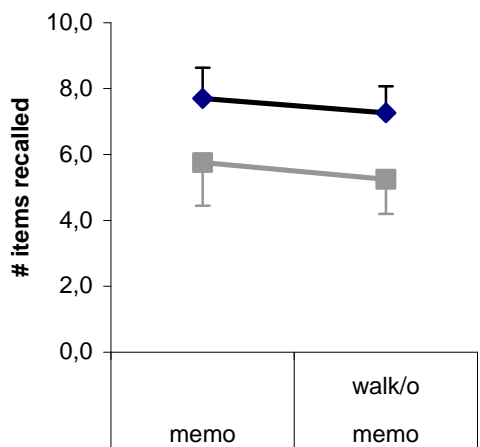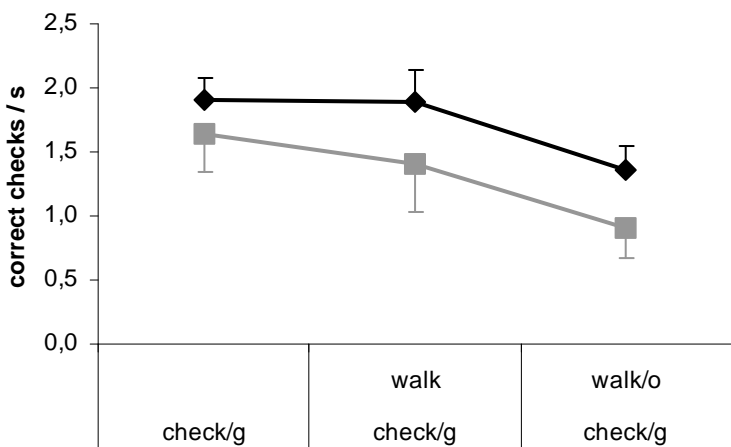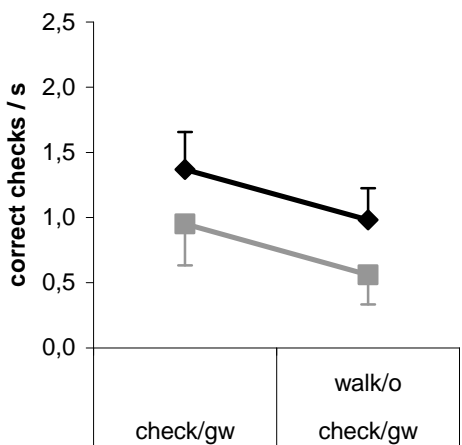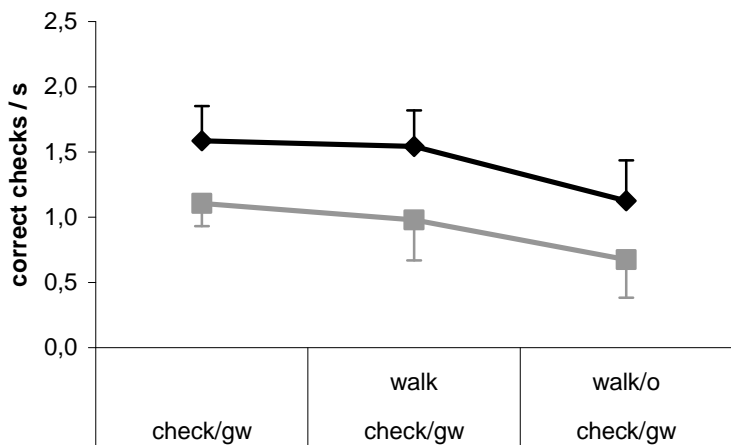

Supplement: MOESM1 [file 9605410]
